# Supplementary material
Source: ML conference proceedings conference paper supplement (https://openreview.net/forum?id=ezgCdnzApo)
Supplement: supplementary_material [file attachment]

## A APPENDIX

### A.1 EXPERIMENT HYPERPARAMETERS

This section contains additional experimental details and hyperparameters. All models were implemented in PyTorch 1.12 distributed by [Paszke et al. \(2019\)](#). Several assets were forked from [Esser et al. \(2021\)](#); [Vahdat & Kautz \(2020\)](#) and [Sajjadi et al. \(2018\)](#) to assist with benchmarking.

| Group           | Hyperparameter     | FashionMNIST | CIFAR10  | CelebA64  | Imagenet64 |
|-----------------|--------------------|--------------|----------|-----------|------------|
| General         | Batch Size         | 32           | 32       | 32        | 32         |
|                 | Epochs             | 350          | 650      | 250       | 650        |
| Optimizer       | Name               | Adam         | Adam     | Adam      | Adam       |
|                 | Learning Rate      | $5e-4$       | $5e-4$   | $5e-4$    | $5e-4$     |
|                 | Betas              | 0.5, 0.9     | 0.5, 0.9 | 0.5, 0.9  | 0.5, 0.9   |
| Codebook<br>(2) | Units ( $D + D'$ ) | 16 + 16      | 96 + 96  | 256 + 256 | 256 + 256  |
|                 | Beta               | 0.25         | 0.25     | 0.25      | 0.25       |

Table 2: Hyper-parameters for every model across each dataset.

| Down-sampling factor ( $F$ )    |                   | 7/8     | 14        | 16        | 28        | 32          | 64          |
|---------------------------------|-------------------|---------|-----------|-----------|-----------|-------------|-------------|
| Encoder<br>1 ( $\mathcal{E}$ )  | Kernels           | 4,3,3,3 | 4,3,3,3,3 | 4,4,4,3,3 | 4,4,4,4,3 | 4,3,3,3,3,3 | 4,4,4,4,4,4 |
|                                 | Channels          | 128     | 128       | 128       | 128       | 128         | 128         |
|                                 | Residual Blocks   | 2       | 2         | 2         | 2         | 2           | 2           |
|                                 | Residual Kernels  | 3,1     | 3,1       | 3,1       | 3,1       | 3,1         | 3,1         |
|                                 | Residual Channels | 64      | 64        | 64        | 64        | 64          | 64          |
| Encoder<br>2 ( $\mathcal{E}'$ ) | Kernels           | 4,3,3   | 4,3       | 4,3,3     | 4,3       | 4,3         | 3,1         |
|                                 | Channels          | 128     | 128       | 128       | 128       | 128         | 128         |
|                                 | Residual Blocks   | 2       | 2         | 2         | 2         | 2           | 2           |
|                                 | Residual Kernels  | 3,1     | 3,1       | 3,1       | 3,1       | 3,1         | 3,1         |
|                                 | Residual Channels | 64      | 64        | 64        | 64        | 64          | 64          |
| Decoder<br>1 ( $\mathcal{D}$ )  | Kernels           | 3,3,4,4 | 2,2,3,4,4 | 3,4,4,4,4 | 1,2,3,4,4 | 2,2,4,4,4,4 | 2,4,4,4,4,4 |
|                                 | Channels          | 128     | 128       | 128       | 128       | 128         | 128         |
|                                 | Residual Blocks   | 2       | 2         | 2         | 2         | 2           | 2           |
|                                 | Residual Kernels  | 3,1     | 3,1       | 3,1       | 3,1       | 3,1         | 3,1         |
|                                 | Residual Channels | 64      | 64        | 64        | 64        | 64          | 64          |
| Decoder<br>2 ( $\mathcal{F}$ )  | Kernels           | 2,2,4   | 2,1       | 2,1       | 2,1       | 2,1         | 2,1         |
|                                 | Channels          | 128     | 128       | 128       | 128       | 128         | 128         |
|                                 | Residual Blocks   | 2       | 2         | 2         | 2         | 2           | 2           |
|                                 | Residual Kernels  | 3,1     | 3,1       | 3,1       | 3,1       | 3,1         | 3,1         |
|                                 | Residual Channels | 64      | 64        | 64        | 64        | 64          | 64          |

Table 3: Encoder and decoder based on VQVAE2 ([Razavi et al. \(2019\)](#)) with batch normalisation between layers. Encoders use convolutional layers with intermediate ReLU activation layers. Decoders use one convolutional layer followed by deconvolutional layers with LeakyReLU activations.

| #Tokens per Instance  |                | 1 + 1 | 4 + 1 | 16 + 1 |
|-----------------------|----------------|-------|-------|--------|
| Primary Transformer   | Layers         | 4     | 8     | 12     |
|                       | Heads          | 4     | 8     | 8      |
|                       | Embed Units    | 64    | 128   | 256    |
|                       | Parameters (M) | 0.2   | 1.6   | 9.5    |
| Secondary Transformer | Layers         | 4     | 4     | 4      |
|                       | Heads          | 4     | 4     | 4      |
|                       | Embed Units    | 64    | 128   | 256    |
|                       | Parameters (M) | 0.2   | 0.8   | 3.2    |

Table 4: Hyper-parameters for probabilistic models used to learn the categorical posterior.

## A.2 ADDITIONAL METRICS

| Metric                   | Dataset    | Tokens per Instance |              | 1 + 1        |              | 4 + 1        |              | 16 + 1       |  |
|--------------------------|------------|---------------------|--------------|--------------|--------------|--------------|--------------|--------------|--|
|                          |            | Codebook Entries    | 16           | 256          | 16           | 256          | 16           | 256          |  |
| FID*↓                    | CIFAR10    | VQGAN               | 230.79       | 158.76       | 69.25        | 46.86        | <b>46.24</b> | <b>41.54</b> |  |
|                          |            | MVQGAN              | <b>55.16</b> | <b>51.81</b> | <b>50.19</b> | <b>41.72</b> | 47.42        | 46.23        |  |
|                          | CelebA64   | VQGAN               | 114.82       | 89.65        | 35.05        | 29.80        | 29.83        | 29.02        |  |
|                          |            | MVQGAN              | <b>34.07</b> | <b>31.53</b> | <b>31.14</b> | <b>29.05</b> | <b>26.87</b> | <b>25.69</b> |  |
|                          | ImageNet64 | VQGAN               | 286.01       | 181.02       | 154.25       | 81.27        | 63.57        | 62.52        |  |
|                          |            | MVQGAN              | <b>85.04</b> | <b>74.26</b> | <b>65.52</b> | <b>61.84</b> | <b>61.79</b> | <b>60.50</b> |  |
| Primary NLL              | CIFAR10    | VQGAN               | 1.307        | 2.441        | 1.990        | 2.289        | 2.011        | 2.251        |  |
|                          |            | MVQGAN              | 2.043        | 4.073        | 1.906        | 4.284        | 1.879        | 4.458        |  |
|                          | CelebA64   | VQGAN               | 1.697        | 1.934        | 1.885        | 3.484        | 1.906        | 2.575        |  |
|                          |            | MVQGAN              | 2.065        | 4.004        | 1.990        | 4.263        | 1.761        | 3.843        |  |
|                          | ImageNet64 | VQGAN               | 1.841        | 2.121        | 1.984        | 2.537        | 1.738        | 1.650        |  |
|                          |            | MVQGAN              | 1.931        | 3.940        | 1.876        | 4.289        | 1.798        | 3.711        |  |
| Secondary NLL            | CIFAR10    | VQGAN               | 1.074        | 2.474        | 1.825        | 3.536        | 1.741        | 2.730        |  |
|                          |            | MVQGAN              | 2.015        | 2.415        | 1.765        | 2.700        | 1.834        | 3.012        |  |
|                          | CelebA64   | VQGAN               | 1.960        | 2.895        | 2.032        | 3.789        | 1.838        | 3.987        |  |
|                          |            | MVQGAN              | 1.882        | 2.940        | 1.650        | 1.527        | 1.433        | 1.743        |  |
|                          | ImageNet64 | VQGAN               | 1.963        | 3.590        | 1.789        | 3.990        | 1.810        | 3.927        |  |
|                          |            | MVQGAN              | 1.590        | 2.311        | 1.503        | 2.483        | 1.523        | 1.858        |  |
| $F_{\beta=1/8} \uparrow$ | CIFAR10    | VQGAN               | 0.152        | 0.643        | 0.741        | 0.835        | 0.855        | <b>0.904</b> |  |
|                          |            | MVQGAN              | <b>0.746</b> | <b>0.752</b> | <b>0.883</b> | <b>0.890</b> | <b>0.866</b> | 0.896        |  |
|                          | CelebA64   | VQGAN               | 0.280        | 0.452        | 0.778        | 0.791        | 0.857        | 0.869        |  |
|                          |            | MVQGAN              | <b>0.757</b> | <b>0.757</b> | <b>0.792</b> | <b>0.827</b> | <b>0.882</b> | <b>0.905</b> |  |
|                          | ImageNet64 | VQGAN               | 0.073        | 0.327        | 0.311        | 0.582        | 0.633        | 0.652        |  |
|                          |            | MVQGAN              | <b>0.590</b> | <b>0.660</b> | <b>0.652</b> | <b>0.658</b> | <b>0.676</b> | <b>0.718</b> |  |

Table 5: Sample FID (FID\*), negative log-likelihood (NLL) and F-score for validation split.

| #Tokens per Image | Down Sampling Factor ( $\mathcal{F}$ ) |       | Time to Sample (s) |          |
|-------------------|----------------------------------------|-------|--------------------|----------|
|                   | 256x256                                | 64x64 | GPU                | CPU      |
| 1024 + 1          | 8                                      | 2     | 511.047            | 1365.668 |
| 256 + 1           | 16                                     | 4     | 14.844             | 268.368  |
| 64 + 1            | 32                                     | 8     | 0.718              | 11.107   |
| 16 + 1            | 64                                     | 16    | 0.098              | 0.637    |
| 4 + 1             | 128                                    | 32    | 0.031              | 0.070    |
| 1 + 1             | 256                                    | 64    | 0.013              | 0.014    |

Table 6: Comparisons of token sampling times across consumer grade hardware: Nvidia RTX2080 (GPU) and Intel i9-9900 (CPU)

## A.3 RECONSTRUCTION QUALITY

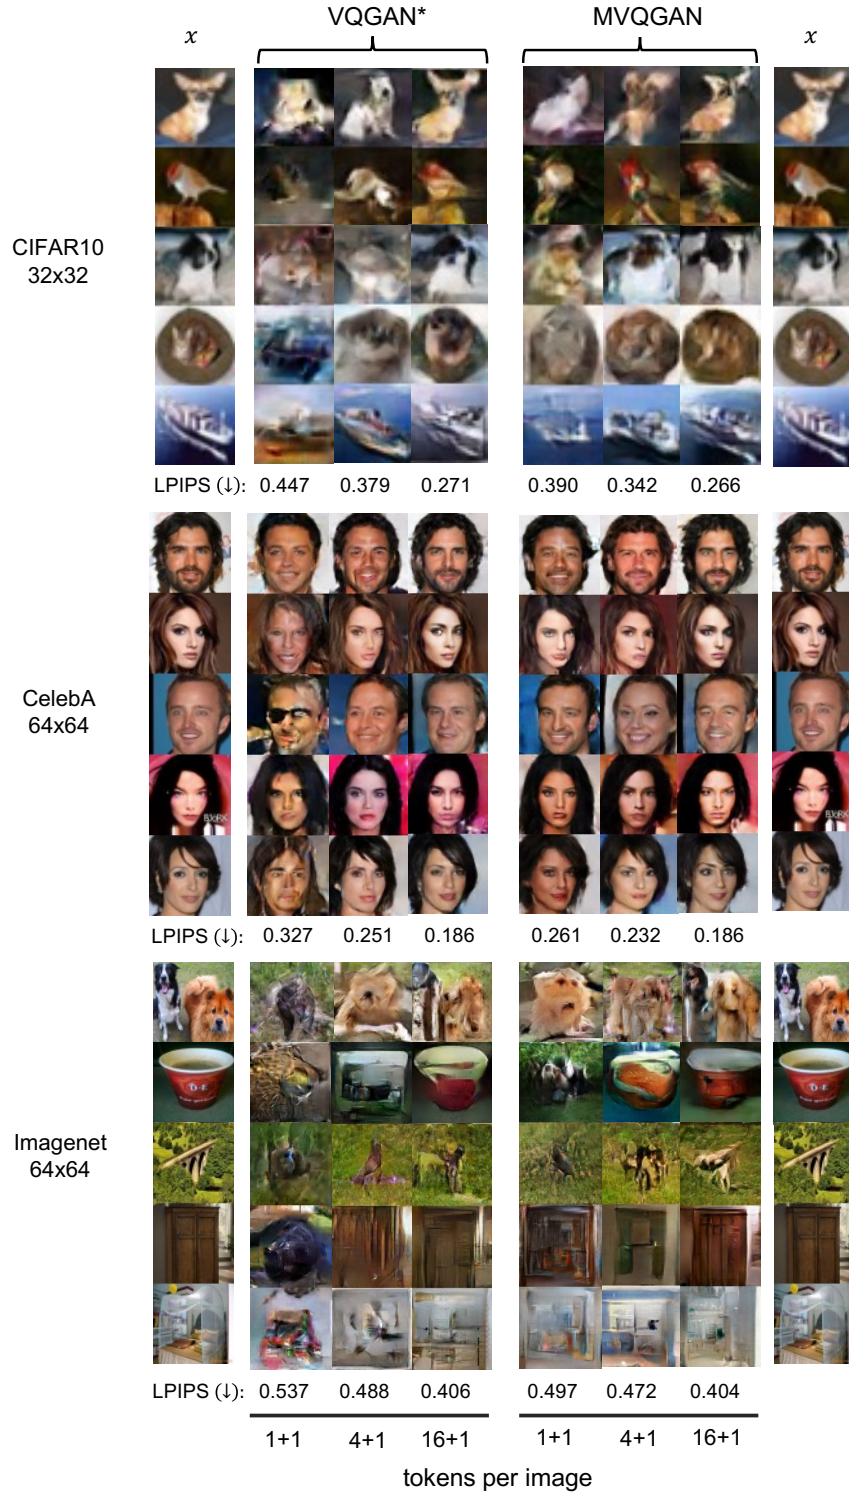

Figure 7: Reconstruction of instances (validation) using 256 codebook entries.

## A.4 DIVERSITY OF MASKED CONFIGURATIONS OF THE SAME CODE VECTOR

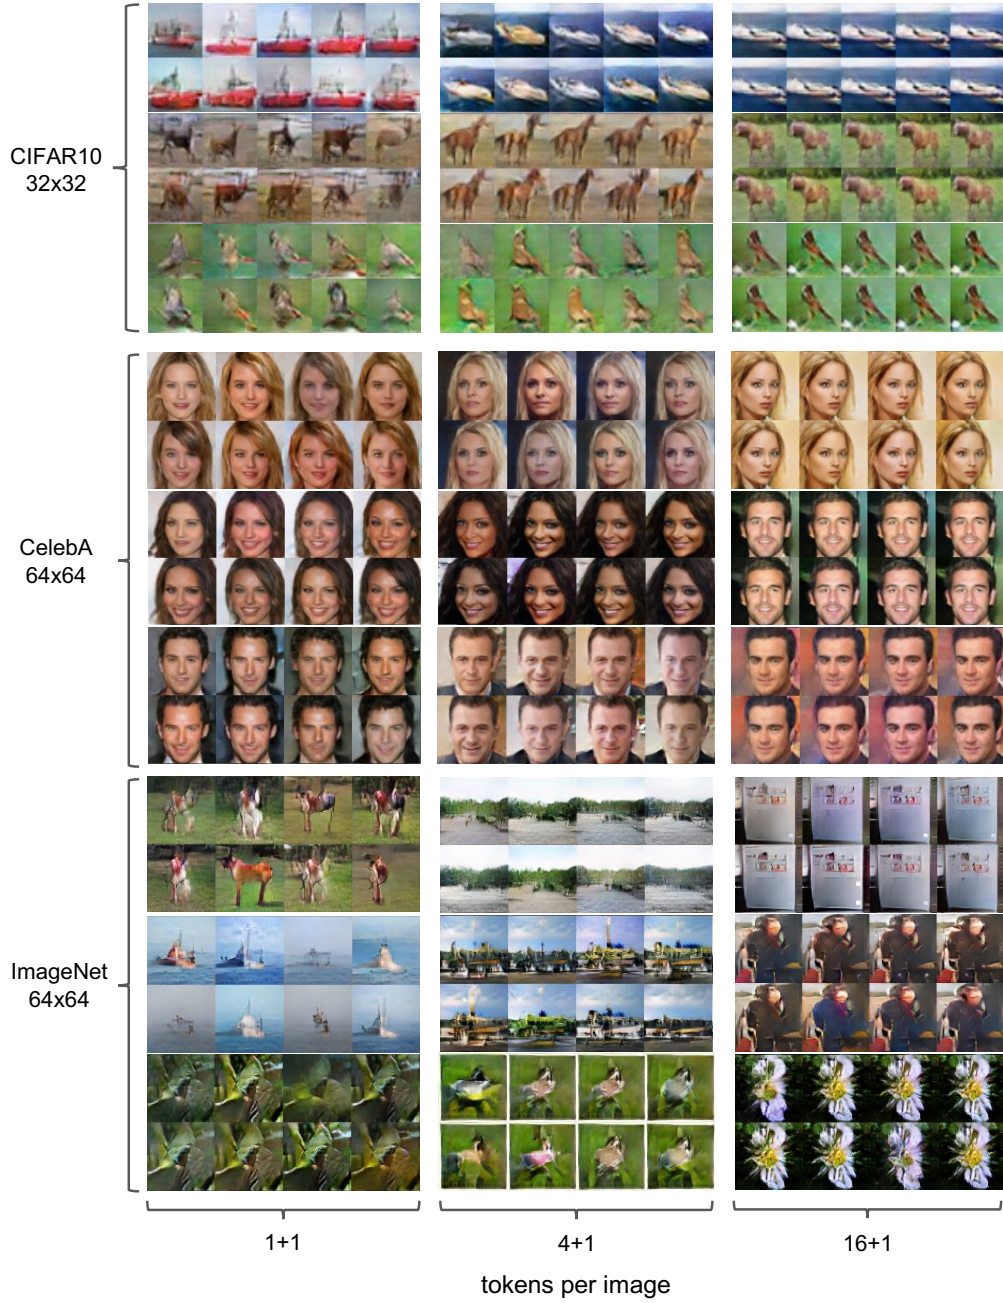

Figure 8: MVQGAN with 256 codebook entries. Each  $2 \times 4$  or  $2 \times 5$  block represents masked configurations of the same code vector. This demonstrates that the diversity decreases as the number of token per image increases.

## A.5 REPRESENTATIONAL TRANSFER

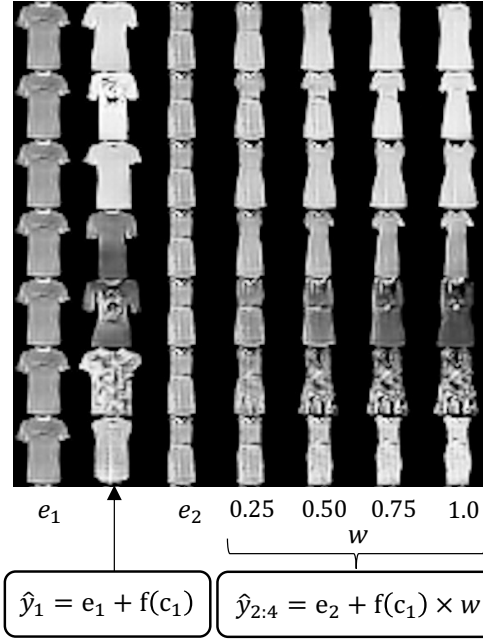

Figure 9: MVQGAN (K=4, S=1+1) demonstrating representational transfer on FashionMNIST. This demonstrates the transfer of patterns, tones, and shapes from centroid  $e_1$  to  $e_2$ .

#### A.6 COMPARISON TO VQVAE2

In this section, we discuss the similarities and differences between the MVQ and VQVAE2 architecture. The major difference is that MVQ finds a mask for the secondary latent representation for each instance (Sec 3.2). The mask is the best of a randomised search of possible masks as determined by reconstruction error in MH-Dropout (Sec 3.3).

There are similarities between MVQ’s and VQVAE2’s primary-secondary pipelines, however there are two main differences:

1. Secondary Encoder: As per Algorithm 1 (step 3) in [Razavi et al. \(2019\)](#), the secondary encoder takes as input both the instance  $\mathbf{x}$  and output of the primary encoder. As per Figure 3, the MVQ secondary encoder only takes the output of the primary encoder.
2. Decoder: As per Algorithm 1 (step 5) in [Razavi et al. \(2019\)](#), the VQVAE2 decoder accepts a concatenated primary and secondary code vector. As per Figure 3 and Equation 5, the MVQ decoder accepts the summation of the primary code vector and masked secondary code vector.
